# Supplementary material for: Electroactive tetrathiafulvalene based pyridine-mono and -bis(1,2,3-triazoles) click ligands: synthesis, crystal structures and coordination chemistry
Source: Royal Society of Chemistry journal article supplement (doi:10.1039/c4ce00736k), 2014-01-01
Supplement: c4ce00736k1.pdf [file c4ce00736k1.pdf]

**Electroactive Tetrathiafulvalene Based Pyridine-mono and -bis(1,2,3-triazoles) Click Ligands: Synthesis, Crystal Structures and Coordination Chemistry**

Thomas Biet and Narcis Avarvari\*

**SUPPORTING INFORMATION**

## X-Ray structures of the ligands

### Compound 2

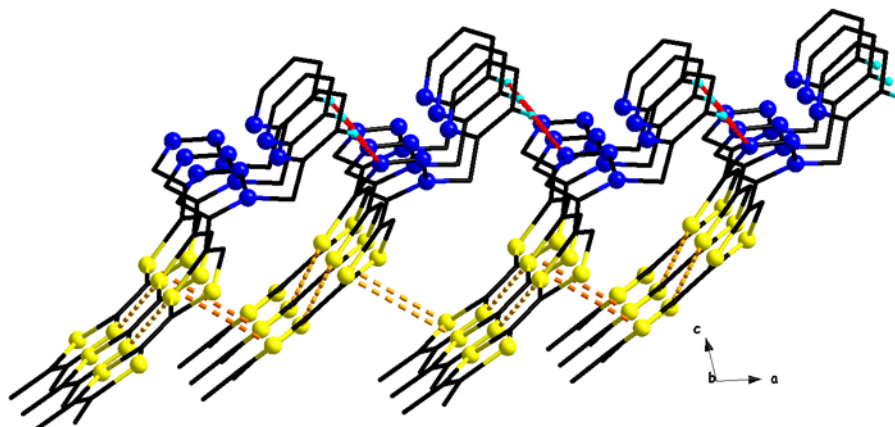

**Figure S1.** Packing diagram for **2** in the *ac* plane with S $\cdots$ S and N $\cdots$ H intermolecular contacts. S2 $\cdots$ S1 3.90 Å and S2 $\cdots$ S3 3.94 Å; N3 $\cdots$ H13 2.67 Å.

**Table S1.** Selected lengths (Å) and angles (°) for **2**

| Distances (Å)             | Torsion Angle (°) (calc) | Dihedral Angle between two planes(°) (calc) |                                                                 |
|---------------------------|--------------------------|---------------------------------------------|-----------------------------------------------------------------|
| C(3)-C(4)                 | 1.337(5)                 | C(6)-C(5)-C(7)-C(8) 42.72                   | S(2)-C(4)-S(4)-C(5)-C(6) &<br>C(7)-N(3)-N(1)-N(2)-C(8)<br>41.12 |
| S-C int.                  | 1.763(4)                 | C(6)-C(5)-C(7)-N(1) 45.75                   |                                                                 |
| C(1)-C(2)                 | 1.325(5)                 |                                             |                                                                 |
| C(5)-C(6)                 | 1.333(5)                 |                                             |                                                                 |
| C(7)-C(8)                 | 1.366(5)                 |                                             |                                                                 |
| C(.)-N <sub>trz</sub> (.) | 1.355(5)                 |                                             |                                                                 |
| N(1)-N(2)                 | 1.351(4)                 |                                             |                                                                 |
| N(2)-N(3)                 | 1.319(5)                 |                                             |                                                                 |

Intermolecular contacts: S2-S3: 3.94 Å; S2-S1: 3.90 Å; N3-H13: 2.67 Å.

### Compound 3

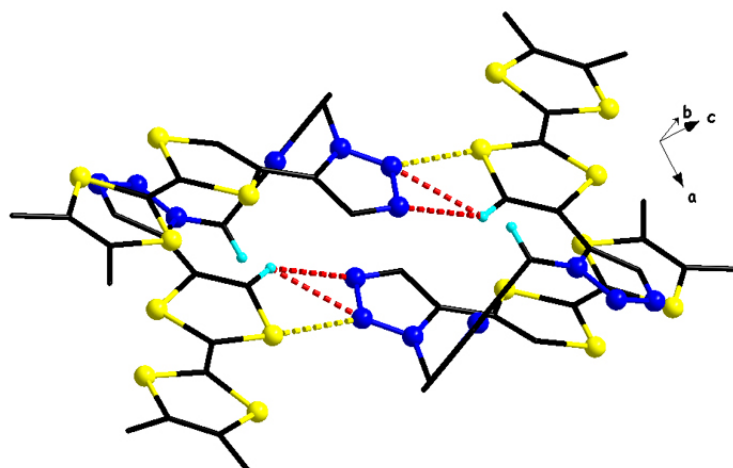

**Figure S2.** Packing diagram for **3** with N...S and N...H intermolecular contacts. S2...S4 3.24 Å; N2...H6 2.68 Å and N3...H6 2.60 Å.

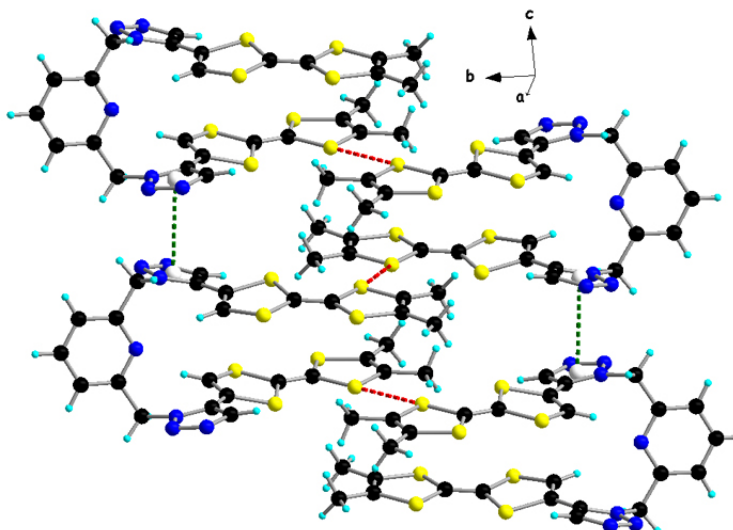

**Figure S3.** Packing diagram for **3** with S...S and triazole...triazole intermolecular contacts. S1...S1 3.59 Å; trz...trz 3.59 Å.

**Table S2.** Selected lengths (Å) and angles (°) for **3**

| Distances (Å)             | Torsion Angle (°) (calc) |                     | Dihedral Angle between two planes (°) (calc) |
|---------------------------|--------------------------|---------------------|----------------------------------------------|
| C(3)-C(4)                 | 1.351(6)                 | C(6)-C(5)-C(7)-C(8) | 18.39                                        |
| S-C int.                  | 1.754(4)                 | C(6)-C(5)-C(7)-N(1) | 22.25                                        |
| C(1)-C(2)                 | 1.334(6)                 |                     | 20.18                                        |
| C(5)-C(6)                 | 1.334(5)                 |                     |                                              |
| C(7)-C(8)                 | 1.366(6)                 |                     |                                              |
| C(-)-N <sub>trz</sub> (.) | 1.351(6)                 |                     |                                              |
| N(1)-N(2)                 | 1.349(5)                 |                     |                                              |
| N(2)-N(3)                 | 1.316(5)                 |                     |                                              |

Intermolecular contacts: S1-S1: 3.59 Å; N2-S4: 3.24 Å; N2-H6: 2.68 Å; N3-H6 : 2.60 Å.

## UV-Vis spectra of CH<sub>2</sub>Cl<sub>2</sub> solutions

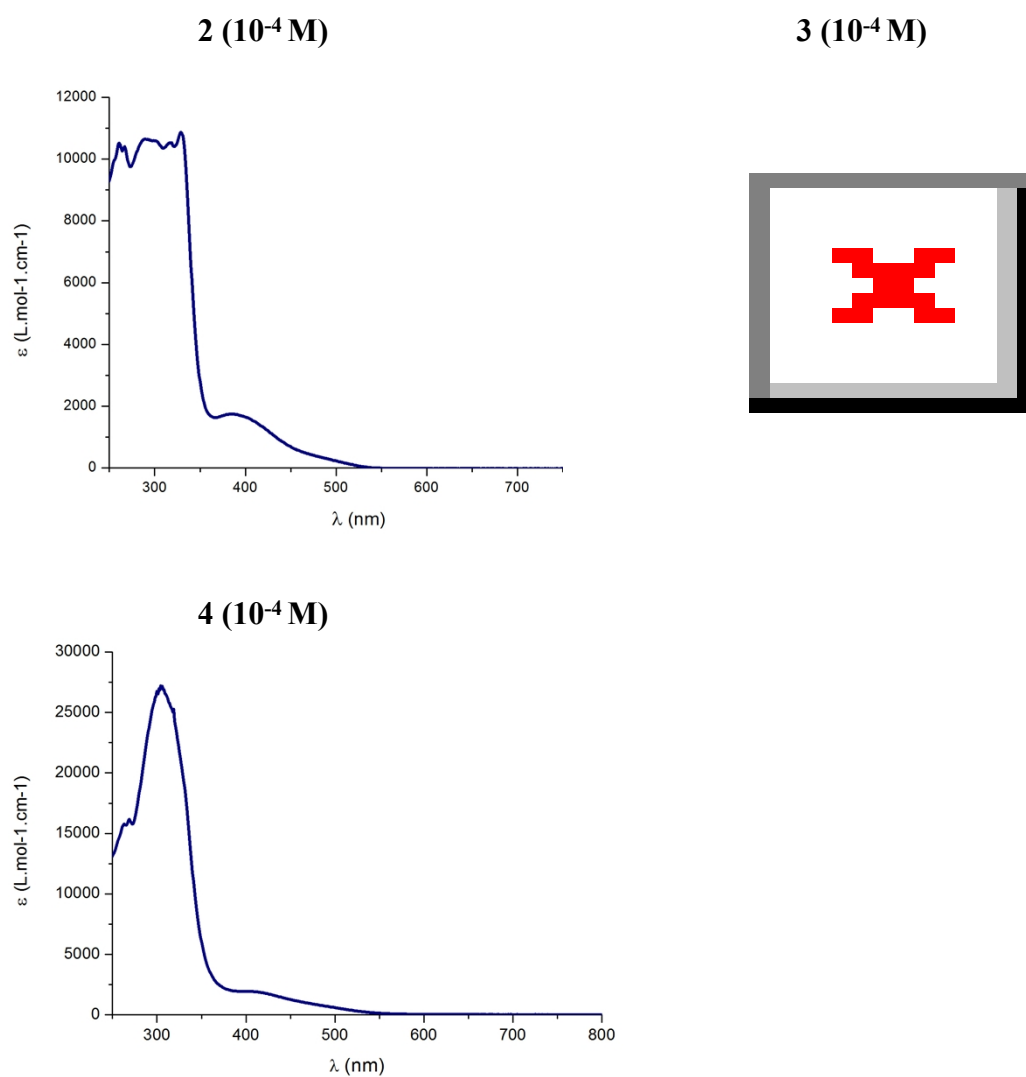

**Figure S4.** UV-Vis spectra.

**Table S3.** UV-Vis data.

| compound | $\lambda_{\text{max}}$ (nm) | $\epsilon$ (L.mol <sup>-1</sup> .cm <sup>-1</sup> ) |
|----------|-----------------------------|-----------------------------------------------------|
| <b>2</b> | 386                         | 1759                                                |
| <b>3</b> | 397                         | 3480                                                |
| <b>4</b> | 405                         | 1980                                                |

**Electrochemical studies.** Cyclic voltammetry measurements were performed using a three-electrode cell equipped with a platinum millielectrode of 0.126 cm<sup>2</sup> area, an Ag/Ag<sup>+</sup> pseudo-reference and a platinum wire counter-electrode. The potential values were then re-adjusted with respect to the saturated calomel electrode (SCE). The electrolytic media involved a 0.1 mol.L<sup>-1</sup> solution of (*n*-Bu)<sub>4</sub>NPF<sub>6</sub> in CH<sub>2</sub>Cl<sub>2</sub>. All experiments have been performed at room temperature at 0.1 V·s<sup>-1</sup>. Experiments have been carried out with an EGG PAR 273A potentiostat with positive feedback compensation.

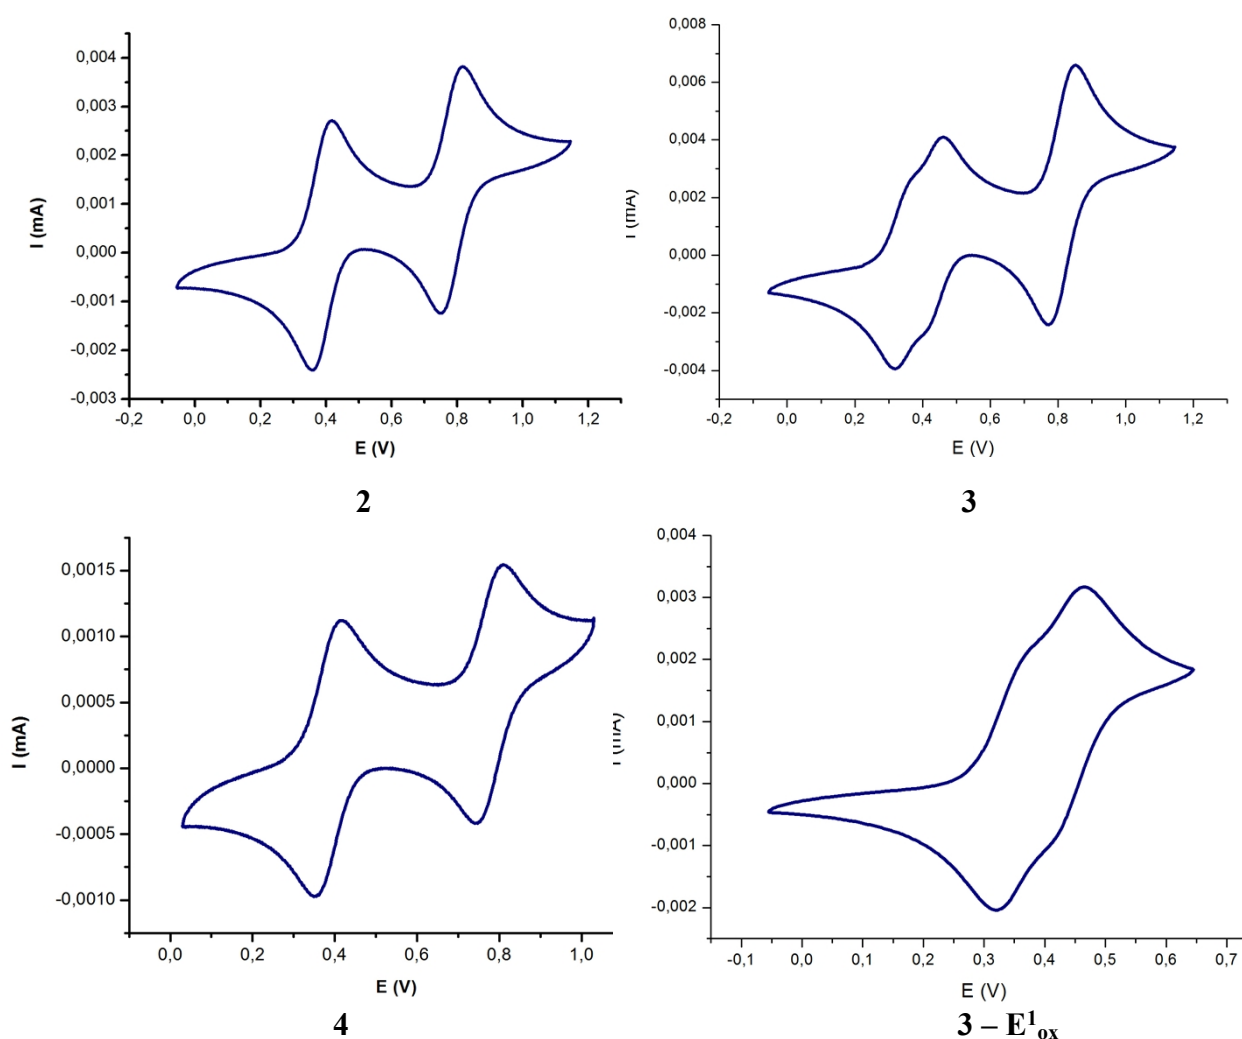

**Figure S5.** Cyclic voltammograms.

**Table S4.** Oxidation potentials from cyclic voltammetry data. Measurements have been performed in CH<sub>2</sub>Cl<sub>2</sub> in the presence of (*n*-Bu<sub>4</sub>N)PF<sub>6</sub> (0.1 M) at a scan rate of 0.1 V·s<sup>-1</sup>.

| compound | E <sup>1</sup> <sub>1/2</sub> (V) | E <sup>2</sup> <sub>1/2</sub> (V) |
|----------|-----------------------------------|-----------------------------------|
| <b>2</b> | 0.38                              | 0.78                              |
| <b>3</b> | 0.34 + 0.44                       | 0.81                              |
| <b>4</b> | 0.38                              | 0.78                              |

## X-Ray structures of the complexes

### Complex 4

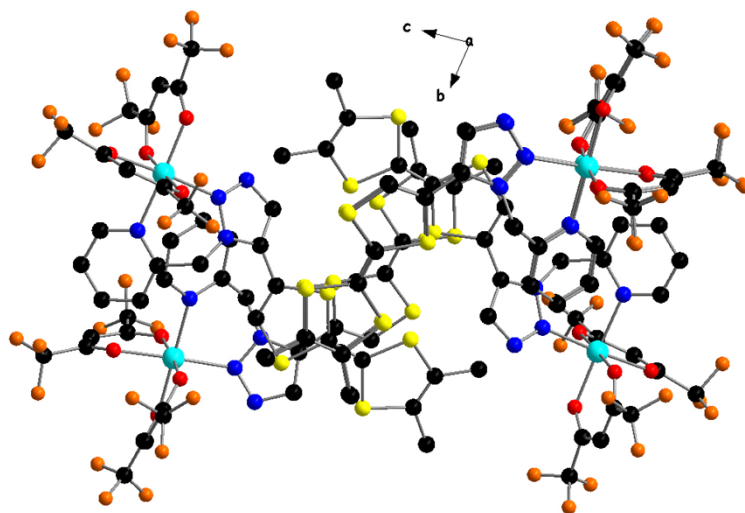

Figure S6. Packing diagram for 4.

Table S5. Selected lengths (Å) and angles (°) for 4.

| Distances (Å)<br><i>s-cis/s-trans</i>           |                       | Angles (°) (calc) |          |
|-------------------------------------------------|-----------------------|-------------------|----------|
| C(3)-C(4) / C(31)-C(32)                         | 1.349(13) / 1.346(12) | O3—Co1—O4         | 88.2(3)  |
| C(7)-N(1) / C(35)-N(5)                          | 1.376(11) / 1.352(10) | O2—Co1—N2         | 91.9(3)  |
| C(8)-N(3) / C(36)-N(7)                          | 1.344(12) / 1.356(12) | O4—Co1—N4         | 93.6(3)  |
| N(3)-N(2) / N(7)-N(6)                           | 1.330(1) / 1.317(10)  | N2—Co1—N4         | 88.4(3)  |
| N(2)-N(1) / N(6)-N(5)                           | 1.333(10) / 1.360(1)  | O4—Co1—N2         | 178.0(3) |
|                                                 |                       | O8—Co2—O6         | 87.7(3)  |
| Co(1)-N <sub>moy</sub> / Co(2)-N <sub>moy</sub> | 2.149(8) / 2.160(8)   | O6—Co2—N8         | 91.5(3)  |
| Co(1)-O <sub>moy</sub> / Co(2)-O <sub>moy</sub> | 2.068(7) / 2.061(7)   | O8—Co2—N6         | 95.1(3)  |
|                                                 |                       | N6—Co2—N8         | 85.9(3)  |
|                                                 |                       | O6—Co2—N6         | 175.3(3) |

| Torsion Angle (°) (calc) |       | Dihedral Angle between two planes(°) (calc)              |
|--------------------------|-------|----------------------------------------------------------|
| C(6)-C(5)-C(7)-C(8)      | 30.34 | S(3)-C(4)-S(4)-C(5)-C(6) & C(7)-N(3)-N(1)-N(2)-C(8)      |
| C(6)-C(5)-C(7)-N(1)      | 26.83 |                                                          |
|                          |       | 36.55                                                    |
| C(33)-C(34)-C(35)-C(36)  | 51.85 | S(5)-C(32)-S(6)-C(33)-C(34) & C(35)-N(5)-N(6)-N(7)-C(36) |
| C(33)-C(34)-C(35)-N(5)   | 46.13 |                                                          |
|                          |       | 48.37                                                    |

Complex 5

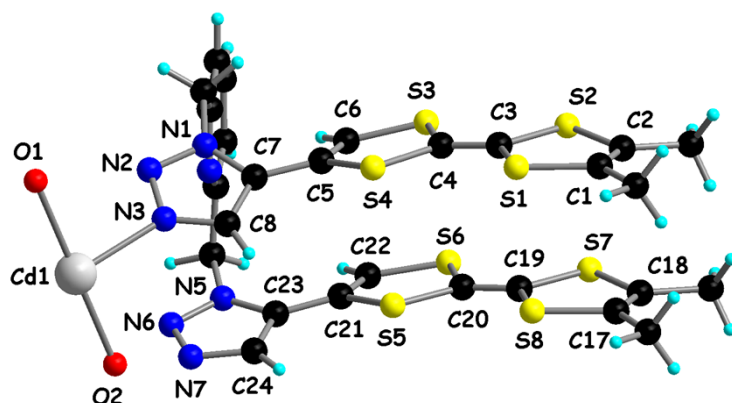

Figure S7. Molecular structure for 5.

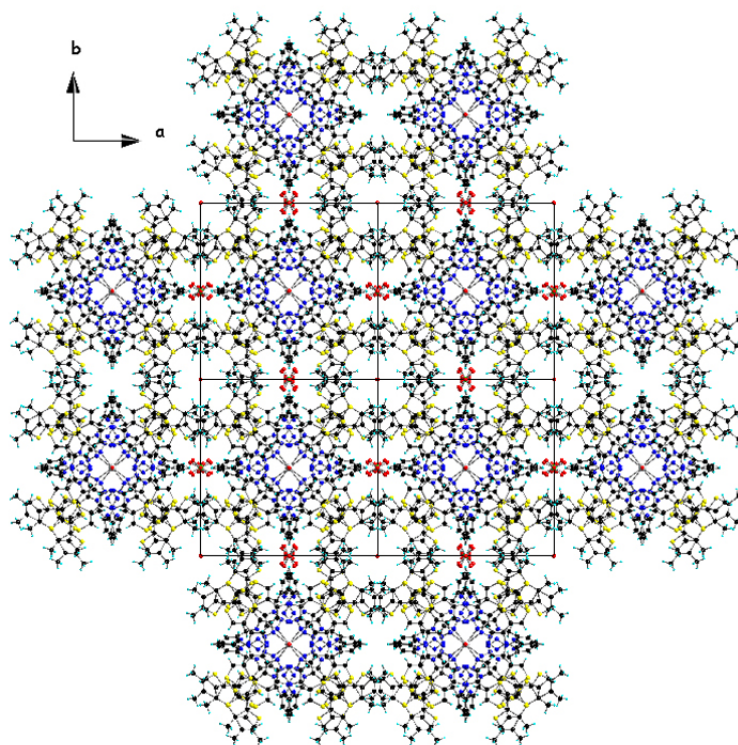

Figure S8. Packing diagram for 5.

Table S6. Selected lengths (Å) and angles (°) for 5

| Distances (Å)                 |           |                        |           |
|-------------------------------|-----------|------------------------|-----------|
| “Coordinated triazole moiety” |           | “Free triazole moiety” |           |
| C(3)-C(4)                     | 1.334(8)  | C(19)-C(20)            | 1.318(9)  |
| S-C int.                      | 1.760(6)  | S-C int.               | 1.764(7)  |
| C(1)-C(2)                     | 1.309(10) | C(17)-C(18)            | 1.299(12) |
| C(5)-C(6)                     | 1.341(8)  | C(21)-C(22)            | 1.337(8)  |
| C(7)-C(8)                     | 1.373(7)  | C(23)-C(24)            | 1.358(8)  |

|                           |          |                           |          |
|---------------------------|----------|---------------------------|----------|
| C(.)-N <sub>trz</sub> (.) | 1.338(7) | C(.)-N <sub>trz</sub> (.) | 1.350(9) |
| N(1)-N(2)                 | 1.337(6) | N(5)-N(6)                 | 1.349(7) |
| N(2)-N(3)                 | 1.331(6) | N(6)-N(7)                 | 1.290(9) |

| Distances (Å) |          | Angles (°) (calc) |          |
|---------------|----------|-------------------|----------|
| Cd(1)-O(1)    | 2.328(8) | O1—Cd1—O2         | 180.0(3) |
| Cd(1)-O(2)    | 2.267(9) | O2—Cd1—N3         | 89.4(15) |
| Cd(1)-N(3)    | 2.330(4) | O1—Cd1—N3         | 90.6(15) |

| Torsion Angle (°) (calc) |       | Dihedral Angle between two planes(°) (calc)              |       |
|--------------------------|-------|----------------------------------------------------------|-------|
| C(6)-C(5)-C(7)-C(8)      | 37.02 | S(3)-C(4)-S(4)-C(5)-C(6) & C(7)-N(3)-N(1)-N(2)-C(8)      | 37.93 |
| C(6)-C(5)-C(7)-N(1)      | 39.31 |                                                          |       |
| C(22)-C(21)-C(23)-C(24)  | 21.04 | S(5)-C(20)-S(6)-C(21)-C(22) & C(23)-N(5)-N(6)-N(7)-C(24) | 19.27 |
| C(22)-C(21)-C(23)-N(5)   | 19.64 |                                                          |       |

Intermolecular contacts: N5-H11B: 2.58 Å; N6-H11B: 2.84 Å.

Intramolecular contacts: N7-O2: 3.09 Å.



## Complex 6

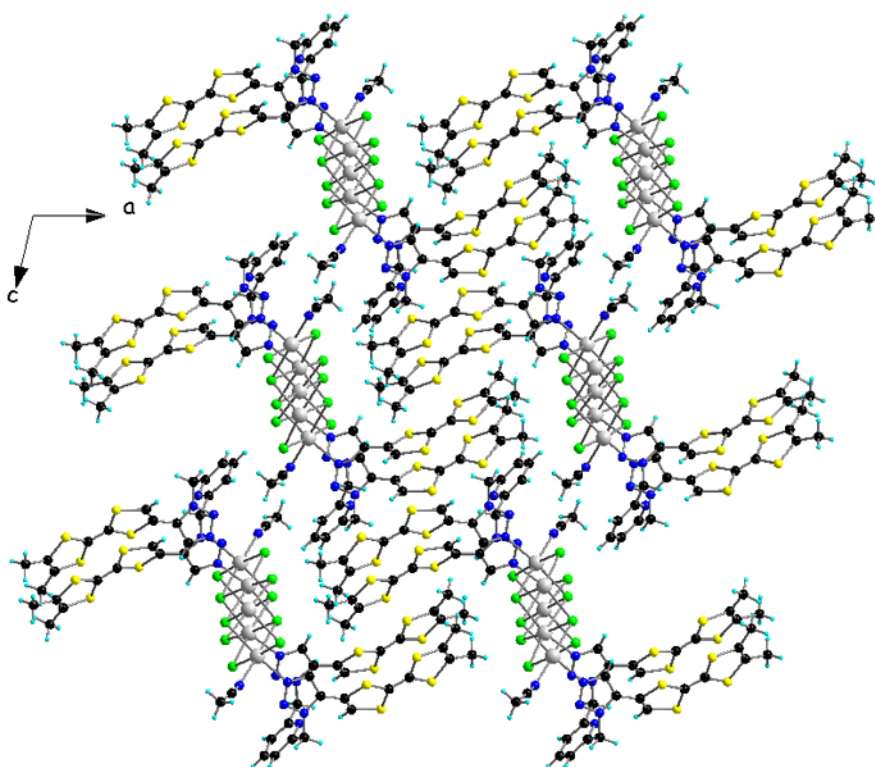

Figure S9. Packing diagram for 6.

Table S7. Selected lengths (Å) and angles (°) for 6

| Distances (Å)             |          |                           |          |
|---------------------------|----------|---------------------------|----------|
| C(3)-C(4)                 | 1.337(6) | C(19)-C(20)               | 1.331(5) |
| S-C int.                  | 1.757(5) | S-C int.                  | 1.761(5) |
| C(1)-C(2)                 | 1.327(7) | C(17)-C(18)               | 1.336(8) |
| C(5)-C(6)                 | 1.344(6) | C(21)-C(22)               | 1.346(6) |
| C(7)-C(8)                 | 1.378(6) | C(23)-C(24)               | 1.373(6) |
| C(.)-N <sub>trz</sub> (.) | 1.349(6) | C(.)-N <sub>trz</sub> (.) | 1.355(6) |
| N(1)-N(2)                 | 1.350(5) | N(5)-N(6)                 | 1.341(5) |
| N(2)-N(3)                 | 1.323(5) | N(6)-N(7)                 | 1.315(5) |

| Distances (Å)               |                       | Angles (°) (calc)                     |          |
|-----------------------------|-----------------------|---------------------------------------|----------|
| Cd(1)-N(3)                  | 2.379(4)              | N3—Cd1—N8                             | 92.5(17) |
| Cd(1)-O(2)                  | 2.384(5)              | N3—Cd1—Cl3                            | 92.8(9)  |
| Cd(3)-N(7)                  | 2.323(4)              | N8—Cd1—Cl3                            | 88.0(14) |
| Cd(1)-Cl <sub>min/max</sub> | 2.523(12) / 2.781(11) | N3—Cd1—Cl2                            | 89.6(10) |
| Cd(2)-Cl <sub>min/max</sub> | 2.610(11) / 2.712(12) | N8—Cd1—Cl4                            | 94.2(15) |
| Cd(3)-Cl <sub>min/max</sub> | 2.537(12) / 2.828(11) | N7 <sup>i</sup> —Cd3—Cl2 <sup>i</sup> | 87.92(9) |
|                             |                       | N7 <sup>i</sup> —Cd3—Cl1 <sup>i</sup> | 93.7(10) |

(i) -x, 1-y, -z

| Torsion Angle (°) (calc) |       | Dihedral Angle between two planes(°) (calc)            |       |
|--------------------------|-------|--------------------------------------------------------|-------|
| C(6)-C(5)-C(7)-C(8)      | 44.29 | S(3)-C(4)-S(4)-C(5)-C(6) &<br>C(7)-N(3)-N(1)-N(2)-C(8) | 42.62 |
| C(6)-C(5)-C(7)-N(1)      | 45.89 |                                                        |       |
| C(22)-C(21)-C(23)-C(24)  | 37.54 |                                                        |       |
| C(22)-C(21)-C(23)-N(5)   | 34.16 | S(5)-C(20)-S(6)-C(21)-C(22) &                          |       |

|  |                            |
|--|----------------------------|
|  | C(23)-N(5)-N(6)-N(7)-C(24) |
|  | 32.11                      |
|  |                            |

Intermolecular contacts: N6-H29B: 2.96 Å; S2-S8: 3.96 Å; S4-S6: 3.76 Å.
